# Supplementary material for: PD-L1 is a Prognostic Biomarker in Resected NSCLC Patients with Moderate/high Smoking History and Elevated Serum SCCA Level
Source: PubMed Central journal article supplement — J Cancer. 2017 Sep 15;8(16):3251–60. doi: 10.7150/jca.21118 (PMC5665041; doi:10.7150/jca.21118), 2017-09-15

**Supplementary Table S1.** The association between PD-L1 expression and the clinicopathological factors in adenocarcinoma.

| Variables                        | N   | 1% Cutoff    |           | P*      | 5% Cutoff    |           | P*      | 10% Cutoff   |           | P       |
|----------------------------------|-----|--------------|-----------|---------|--------------|-----------|---------|--------------|-----------|---------|
|                                  |     | PD-L1, N (%) |           |         | PD-L1, N (%) |           |         | PD-L1, N (%) |           |         |
|                                  |     | Negative     | Positive  |         | Negative     | Positive  |         | Negative     | Positive  |         |
| <b>Age (years)</b>               |     |              |           |         |              |           |         |              |           |         |
| < 60                             | 111 | 54 (48.6)    | 57 (51.4) | 0.347   | 68 (61.3)    | 43 (38.7) | 0.901   | 75 (67.6)    | 36 (32.4) | 0.33    |
| ≥ 60                             | 95  | 40 (42.1)    | 55 (57.9) |         | 59 (62.1)    | 36 (37.9) |         | 70 (73.7)    | 25 (26.3) |         |
| <b>Gender</b>                    |     |              |           |         |              |           |         |              |           |         |
| Male                             | 110 | 53 (48.2)    | 57 (51.8) | 0.431   | 72 (65.5)    | 38 (34.5) | 0.229   | 79 (71.8)    | 36 (32.4) | 0.63    |
| Female                           | 96  | 41 (42.7)    | 55 (57.3) |         | 55 (57.3)    | 41 (42.7) |         | 66 (68.8)    | 30 (31.3) |         |
| <b>Smoking Index (SI)</b>        |     |              |           |         |              |           |         |              |           |         |
| SI < 400                         | 133 | 78 (58.6)    | 55 (41.4) | < 0.001 | 95 (71.4)    | 38 (28.6) | < 0.001 | 104 (78.2)   | 29 (21.8) | < 0.001 |
| SI ≥ 400                         | 73  | 16 (21.9)    | 57 (78.1) |         | 32 (43.8)    | 41 (56.2) |         | 41 (56.2)    | 32 (43.8) |         |
| <b>Clinical stage</b>            |     |              |           |         |              |           |         |              |           |         |
| I                                | 105 | 53 (50.5)    | 52 (49.5) | 0.363   | 68 (64.8)    | 37 (35.2) | 0.547   | 76 (72.4)    | 29 (27.6) | 0.49    |
| II                               | 32  | 13 (40.6)    | 19 (59.4) |         | 20 (62.5)    | 12 (37.5) |         | 24 (75.0)    | 8 (25.0)  |         |
| IIIA                             | 69  | 28 (40.6)    | 41 (59.4) |         | 39 (56.5)    | 30 (43.5) |         | 45 (65.2)    | 24 (34.8) |         |
| <b>Tumor size</b>                |     |              |           |         |              |           |         |              |           |         |
| ≤ 3 cm                           | 126 | 59 (46.8)    | 67 (53.2) | 0.666   | 83 (65.9)    | 43 (34.1) | 0.118   | 93 (73.8)    | 33 (26.2) | 0.17    |
| > 3 cm                           | 80  | 35 (43.8)    | 45 (56.2) |         | 44 (55.0)    | 36 (45.0) |         | 52 (65.0)    | 28 (35.0) |         |
| <b>Regional LN metastasis</b>    |     |              |           |         |              |           |         |              |           |         |
| No                               | 109 | 55 (50.0)    | 54 (49.5) | 0.140   | 72 (66.1)    | 37 (33.9) | 0.168   | 81 (74.3)    | 28 (25.7) | 0.19    |
| Yes                              | 97  | 39 (40.2)    | 58 (59.8) |         | 55 (56.7)    | 42 (43.3) |         | 64 (66.0)    | 33 (34.0) |         |
| <b>Solid type adenocarcinoma</b> |     |              |           |         |              |           |         |              |           |         |
| no                               | 185 | 86 (46.5)    | 99 (53.5) | 0.464   | 116 (62.7)   | 69 (37.3) | 0.357   | 133 (71.9)   | 52 (28.1) | 0.16    |
| yes                              | 21  | 8 (38.1)     | 13 (61.9) |         | 11 (52.4)    | 10 (47.6) |         | 12 (57.1)    | 9 (42.9)  |         |
| <b>EGFR mutation</b>             |     |              |           |         |              |           |         |              |           |         |
| No                               | 146 | 68 (46.6)    | 78 (53.4) | 0.671   | 92 (63.0)    | 54 (37.0) | 0.530   | 107 (73.7)   | 39 (26.7) | 0.15    |
| Yes                              | 60  | 26 (43.3)    | 34 (56.7) |         | 35 (58.3)    | 25 (41.7) |         | 38 (63.3)    | 22 (36.7) |         |
| <b>NSE</b>                       |     |              |           |         |              |           |         |              |           |         |
| ≤15.2 ng/ml                      | 159 | 73 (45.9)    | 86 (54.1) | 0.671   | 98 (61.6)    | 61 (38.4) | 0.993   | 112 (70.4)   | 47 (29.6) | 0.97    |
| >15.2 ng/ml                      | 47  | 21 (44.7)    | 26 (55.3) |         | 29 (61.7)    | 18 (38.3) |         | 33 (70.2)    | 14 (29.8) |         |
| <b>CEA</b>                       |     |              |           |         |              |           |         |              |           |         |
| ≤ 5.0 ng/ml                      | 128 | 62 (48.4)    | 66 (51.6) | 0.300   | 79 (61.7)    | 49 (38.3) | 0.979   | 92 (71.9)    | 36 (28.1) | 0.54    |
| > 5.0 ng/ml                      | 78  | 32 (41.0)    | 46 (59.0) |         | 48 (61.5)    | 30 (38.5) |         | 53 (67.9)    | 25 (23.1) |         |
| <b>Cyfra21-1</b>                 |     |              |           |         |              |           |         |              |           |         |
| ≤ 3.3 ng/ml                      | 142 | 59 (41.5)    | 83 (58.5) | 0.080   | 76 (53.5)    | 66 (46.5) | < 0.001 | 93 (65.5)    | 49 (34.5) | 0.02    |
| > 3.3 ng/ml                      | 64  | 35 (54.7)    | 29 (45.3) |         | 51 (79.7)    | 13 (20.3) |         | 52 (81.3)    | 12 (18.8) |         |
| <b>SCCA</b>                      |     |              |           |         |              |           |         |              |           |         |
| ≤ 1.5 ng/ml                      | 186 | 88 (47.3)    | 98 (52.7) | 0.140   | 120 (64.5)   | 66 (35.5) | 0.010   | 136 (73.1)   | 50 (26.9) | 0.00    |
| > 1.5 ng/ml                      | 20  | 6 (30.0)     | 14 (70.0) |         | 7 (35.0)     | 13 (65.0) |         | 9 (45.0)     | 11 (55.0) |         |

LN: lymph node. SI: smoking index = (number of cigarettes per day) × (duration in years). \* P values <0.05 in bold.

**Supplementary Table S2.** The association between PD-L1 expression and the clinicopathological factors in squamous cell carcinoma.

| Variables | 1% Cutoff |          | 5% Cutoff |          | 10% Cutoff |          | 50% Cutoff |          |
|-----------|-----------|----------|-----------|----------|------------|----------|------------|----------|
|           | N         | PD-L1, N | P*        | PD-L1, N | P*         | PD-L1, N | P*         | PD-L1, N |

|                               | N   |         | P      |                          | N       |        | P               |         | N      |                 | P       |        |                 |
|-------------------------------|-----|---------|--------|--------------------------|---------|--------|-----------------|---------|--------|-----------------|---------|--------|-----------------|
|                               | (%) | (%)     | (%)    | (%)                      | (%)     | (%)    | (%)             | (%)     | (%)    | (%)             | (%)     | (%)    |                 |
| <b>Age (years)</b>            |     |         |        |                          |         |        |                 |         |        |                 |         |        |                 |
| < 60                          | 7   | 33      | 44     | 0.9                      | 46      | 31     | 0.1             | 51      | 26     | 0.2             | 62      | 15     | 0.0             |
|                               | 7   | (42.9   | (57.1) | 64                       | (59.7   | (40.3) | 91              | (66.2   | (23.8) | 23              | (80.5   | (19.5) | 71              |
| ≥ 60                          | 8   | 35      | 46     |                          | 40      | 41     |                 | 46      | 35     |                 | 55      | 26     |                 |
|                               | 1   | (43.2   | (56.8) |                          | (49.4   | (50.6) |                 | (56.8   | (43.2) |                 | (67.9   | (32.1) |                 |
| <b>Gender</b>                 |     |         |        |                          |         |        |                 |         |        |                 |         |        |                 |
| Male                          | 1   | 17      | 9      | <b>0.0</b>               | 19      | 7      | <b>0.0</b>      | 20      | 6      | 0.0             | 95      | 37     | 0.1             |
|                               | 3   | (65.4   | (34.6) | <b>12</b>                | (73.1   | (26.9) | <b>37</b>       | (76.9   | (23.1) | 75              | (72.0   | (28.0) | 29              |
| Female                        | 2   | 51      | 81     |                          | 67      | 65     |                 | 77      | 55     |                 | 22      | 4      |                 |
|                               | 6   | (38.6   | (61.4) |                          | (50.8   | (49.2) |                 | (58.3   | (41.7) |                 | (84.6   | (15.4) |                 |
| <b>Smoking Index (SI)</b>     |     |         |        |                          |         |        |                 |         |        |                 |         |        |                 |
| SI < 400                      | 7   | 43      | 27     | < <b>0.001</b>           | 53      | 17     | < <b>0.001</b>  | 55      | 15     | < <b>0.001</b>  | 58      | 12     | <b>0.024</b>    |
|                               | 0   | (61.4   | (28.6) |                          | (75.7   | (24.3) |                 | (78.6   | (21.4) |                 | (82.9   | (17.1) |                 |
| SI ≥ 400                      | 8   | 25      | 63     |                          | 33      | 55     |                 | 42      | 46     |                 | 59      | 29     |                 |
|                               | 8   | (28.4   | (71.6) |                          | (37.5   | (62.5) |                 | (47.7   | (52.3) |                 | (67.0   | (33.0) |                 |
| <b>Clinical stage</b>         |     |         |        |                          |         |        |                 |         |        |                 |         |        |                 |
| I                             | 7   | 30      | 40     | 0.8                      | 40      | 30     | 0.8             | 47      | 23     | 0.3             | 56      | 14     | 0.2             |
|                               | 0   | (42.9   | (57.1) | 59                       | (57.1   | (42.9) | 29              | (67.1   | (32.9) | 95              | (80.0   | (20.0) | 59              |
| II                            | 4   | 16      | 24     |                          | 21      | 19     |                 | 22      | 18     |                 | 29      | 11     |                 |
|                               | 0   | (40.0   | (60.0) |                          | (52.5   | (47.5) |                 | (55.0   | (45.0) |                 | (72.5   | (27.5) |                 |
| IIIA                          | 4   | 22      | 26     |                          | 25      | 23     |                 | 28      | 20     |                 | 32      | 16     |                 |
|                               | 8   | (45.8   | (54.2) |                          | (52.1   | (47.9) |                 | (58.3   | (41.7) |                 | (66.7   | (33.3) |                 |
| <b>Tumor size</b>             |     |         |        |                          |         |        |                 |         |        |                 |         |        |                 |
| ≤ 3 cm                        | 4   | 16      | 31     | 0.1                      | 26      | 21     | 0.8             | 28      | 19     | 0.7             | 33      | 14     | 0.4             |
|                               | 7   | (34.0   | (66.0) | 37                       | (55.3   | (44.7) | 84              | (59.6   | (40.4) | 60              | (70.2   | (29.8) | 74              |
| > 3 cm                        | 1   | 52      | 59     |                          | 60      | 51     |                 | 69      | 42     |                 | 84      | 27     |                 |
|                               | 1   | (46.8   | (53.2) |                          | (54.1   | (45.9) |                 | (62.2   | (37.8) |                 | (75.7   | (24.3) |                 |
| <b>Regional LN metastasis</b> |     |         |        |                          |         |        |                 |         |        |                 |         |        |                 |
| No                            | 9   | 39      | 56     | 0.5                      | 53      | 42     | 0.6             | 61      | 34     | 0.3             | 76      | 19     | <b>0.036</b>    |
|                               | 5   | (41.1   | (58.9) | 36                       | (55.8   | (44.2) | 74              | (64.2   | (35.8) | 72              | (80.0   | (20.0) |                 |
| Yes                           | 6   | 29      | 34     |                          | 33      | 30     |                 | 36      | 27     |                 | 41      | 22     |                 |
|                               | 3   | (46.0   | (54.0) |                          | (52.4   | (47.6) |                 | (57.1   | (42.9) |                 | (65.1   | (34.9) |                 |
| <b>EGFR mutation</b>          |     |         |        |                          |         |        |                 |         |        |                 |         |        |                 |
| No                            | 1   | 64      | 90     | <b>0.033<sup>a</sup></b> | 82      | 72     | 0.1             | 93      | 61     | 0.1             | 113     | 41     | 0.5             |
|                               | 5   | (41.6   | (58.4) |                          | (53.2   | (46.8) | 26 <sup>a</sup> | (60.4   | (39.6) | 60 <sup>a</sup> | (73.4   | (26.6) | 73 <sup>a</sup> |
| Yes                           | 4   | 4       | 0 (0)  |                          | 4       | 0 (0)  |                 | 4       | 0 (0)  |                 | 4       | 0 (0)  |                 |
|                               |     | (100.0) |        |                          | (100.0) |        |                 | (100.0) |        |                 | (100.0) |        |                 |
| <b>NSE</b>                    |     |         |        |                          |         |        |                 |         |        |                 |         |        |                 |
| ≤15.2ng/ml                    | 9   | 39      | 51     | 0.9                      | 49      | 41     | 0.9             | 55      | 35     | 0.9             | 70      | 20     | 0.2             |
|                               | 0   | (41.6   | (56.7) | 31                       | (54.4   | (45.6) | 97              | (61.1   | (38.9) | 33              | (77.8   | (22.2) | 19              |
| >15.2ng/ml                    | 6   | 29      | 39     |                          | 37      | 31     |                 | 42      | 26     |                 | 47      | 21     |                 |

|                  |   |                  |                  |           |                  |                  |           |                  |                  |           |                  |                  |           |
|------------------|---|------------------|------------------|-----------|------------------|------------------|-----------|------------------|------------------|-----------|------------------|------------------|-----------|
| g/ml             | 8 | (42.6<br>)       | (57.<br>74)      |           | (54.4<br>)       | (45.<br>6)       |           | (61.8<br>)       | (38.<br>2)       |           | (69.1<br>)       | (30.<br>9)       |           |
| <b>CEA</b>       |   |                  |                  |           |                  |                  |           |                  |                  |           |                  |                  |           |
| ≤ 5.0<br>ng/ml   | 1 | 42<br>(38.2<br>) | 68<br>(61.<br>8) | 0.0<br>62 | 56<br>(50.9<br>) | 54<br>(49.<br>1) | 0.1<br>78 | 63<br>(57.3<br>) | 47<br>(42.<br>7) | 0.1<br>07 | 80<br>(72.7<br>) | 30<br>(27.<br>3) | 0.5<br>66 |
| > 5.0<br>ng/ml   | 4 | 26<br>(54.2<br>) | 22<br>(45.<br>8) |           | 30<br>(62.5<br>) | 18<br>(37.<br>5) |           | 34<br>(70.8<br>) | 14<br>(29.<br>2) |           | 37<br>(72.1<br>) | 11<br>(22.<br>9) |           |
| <b>Cyfra21-1</b> |   |                  |                  |           |                  |                  |           |                  |                  |           |                  |                  |           |
| ≤ 3.3<br>ng/ml   | 5 | 25<br>(47.2<br>) | 28<br>(52.<br>8) | 0.4<br>56 | 33<br>(32.6<br>) | 20<br>(37.<br>7) | 0.1<br>60 | 35<br>(66.0<br>) | 18<br>(34.<br>0) | 0.3<br>94 | 44<br>(83.0<br>) | 9<br>(17.<br>0)  | 0.0<br>68 |
| > 3.3<br>ng/ml   | 1 | 43<br>(41.0<br>) | 62<br>(59.<br>0) |           | 53<br>(50.5<br>) | 52<br>(49.<br>5) |           | 62<br>(59.0<br>) | 43<br>(41.<br>0) |           | 73<br>(69.5<br>) | 32<br>(30.<br>5) |           |
| <b>SCCA</b>      |   |                  |                  |           |                  |                  |           |                  |                  |           |                  |                  |           |
| ≤ 1.5<br>ng/ml   | 9 | 43<br>(44.3<br>) | 54<br>(55.<br>7) | 0.6<br>79 | 57<br>(58.8<br>) | 40<br>(41.<br>2) | 0.1<br>78 | 63<br>(57.3<br>) | 47<br>(42.<br>7) | 0.4<br>11 | 77<br>(79.4<br>) | 20<br>(20.<br>6) | 0.0<br>54 |
| > 1.5<br>ng/ml   | 6 | 25<br>(41.0<br>) | 36<br>(59.<br>0) |           | 29<br>(47.5<br>) | 32<br>(52.<br>5) |           | 34<br>(70.8<br>) | 14<br>(29.<br>2) |           | 40<br>(65.6<br>) | 21<br>(34.<br>4) |           |

LN: lymph node. AD: adenocarcinoma. SCC: squamous cell carcinoma. SI : smoking index = (number of cigarettes per day) × (duration in years). \*P values < 0.05 in bold.

<sup>a</sup> Fisher exact test.

**Supplementary Table S3.** The association between PD-L2 expression and the clinicopathological factors.

| Variables                     | Number of patients | PD-L2 expression (%) |            | P     |
|-------------------------------|--------------------|----------------------|------------|-------|
|                               |                    | Negative             | Positive   |       |
| <b>Age (years)</b>            |                    |                      |            |       |
| < 60                          | 188                | 93 (49.5)            | 95 (50.5)  | 0.520 |
| ≥ 60                          | 176                | 93 (52.8)            | 83 (42)    |       |
| <b>Gender</b>                 |                    |                      |            |       |
| Male                          | 228                | 114 (50.0)           | 114 (50.0) | 0.587 |
| Female                        | 136                | 72 (52.9)            | 64 (47.1)  |       |
| <b>Smoking Index (SI)</b>     |                    |                      |            |       |
| SI < 400                      | 203                | 108 (53.2)           | 95 (46.8)  | 0.308 |
| SI ≥ 400                      | 161                | 77 (47.8)            | 84 (52.2)  |       |
| <b>Clinical stage</b>         |                    |                      |            |       |
| I                             | 175                | 82 (46.9)            | 93 (53.1)  | 0.178 |
| II                            | 72                 | 43 (59.7)            | 29 (40.3)  |       |
| IIIA                          | 177                | 61 (52.1)            | 56 (47.9)  |       |
| <b>Tumor size</b>             |                    |                      |            |       |
| ≤ 3 cm                        | 167                | 86 (51.5)            | 81 (48.5)  | 0.813 |
| > 3 cm                        | 197                | 99 (50.3)            | 98 (49.7)  |       |
| <b>Regional LN metastasis</b> |                    |                      |            |       |
| No                            | 204                | 102 (50.0)           | 102 (50.0) | 0.722 |
| Yes                           | 160                | 83 (51.9)            | 77 (48.1)  |       |

|                      |     |            |            |       |
|----------------------|-----|------------|------------|-------|
| <b>Histology</b>     |     |            |            |       |
| AD                   | 206 | 102 (49.5) | 104 (50.4) | 0.490 |
| SCC                  | 158 | 84 (53.2)  | 74 (46.8)  |       |
| <b>EGFR mutation</b> |     |            |            |       |
| No                   | 300 | 155 (51.7) | 145 (48.3) | 0.639 |
| Yes                  | 64  | 31 (48.4)  | 33 (51.6)  |       |
| <b>NSE</b>           |     |            |            |       |
| ≤ 15.2 ng/ml         | 249 | 124 (49.8) | 125 (50.2) | 0.465 |
| > 15.2 ng/ml         | 115 | 62 (53.9)  | 53 (46.1)  |       |
| <b>CEA</b>           |     |            |            |       |
| ≤ 5.0 ng/ml          | 238 | 120 (50.4) | 118 (49.6) | 0.722 |
| > 5.0 ng/ml          | 126 | 66 (52.4)  | 60 (47.6)  |       |
| <b>Cyfra21-1</b>     |     |            |            |       |
| ≤ 3.3 ng/ml          | 195 | 96 (49.2)  | 99 (50.8)  | 0.444 |
| > 3.3 ng/ml          | 169 | 90 (53.3)  | 79 (46.7)  |       |
| <b>SCCA</b>          |     |            |            |       |
| ≤ 1.5 ng/ml          | 283 | 102 (50.0) | 102 (50.0) | 0.722 |
| > 1.5 ng/ml          | 81  | 83 (51.9)  | 77 (48.1)  |       |

LN: lymph node. AD: adenocarcinoma. SCC: squamous cell carcinoma. SI, smoking index = (number of cigarettes per day) × (duration in years).

**Supplementary Table S4.** Multivariate analysis for PD-L1 expression.

| Variables                     | 1% Cutoff           |                | 5% Cutoff           |                | 10% Cutoff          |                |
|-------------------------------|---------------------|----------------|---------------------|----------------|---------------------|----------------|
|                               | OR (95%CI)          | P              | OR (95%CI)          | P              | OR (95%CI)          | P              |
| <b>Regional LN metastasis</b> |                     |                |                     |                |                     |                |
| No                            |                     |                |                     |                |                     |                |
| Yes                           |                     |                |                     |                |                     |                |
| <b>SCCA</b>                   |                     |                |                     |                |                     |                |
| ≤ 1.5 ng/ml                   |                     |                | 2.402 (1.358-4.249) | <b>0.003</b>   | 1.761 (1.039-2.984) | <b>0.035</b>   |
| > 1.5 ng/ml                   |                     |                |                     |                |                     |                |
| <b>Smoking Index (SI)</b>     |                     |                |                     |                |                     |                |
| SI < 400                      | 4.319 (2.748-6.787) | < <b>0.001</b> | 3.925 (2.502-6.156) | < <b>0.001</b> | 3.270 (2.068-5.171) | < <b>0.001</b> |
| SI ≥ 400                      |                     |                |                     |                |                     |                |
| <b>Cyfra21-1</b>              |                     |                |                     |                |                     |                |
| ≤ 3.3 ng/ml                   |                     |                | 0.558 (0.342-0.909) | <b>0.019</b>   |                     |                |
| > 3.3 ng/ml                   |                     |                |                     |                |                     |                |

OR: odd ratio. CI: confidence interval. LN: lymph node. SI: smoking index = (number of cigarettes per day) × (duration in years).

**Supplementary Table S5.** Summary of recent studies investigating PD-L1 expression in surgically resected non-small cell lung cancers.

| Author        | Cell type | I/II/III/IV | IHC evaluation | Percentage of tumors with positive PD-L1 expression | clinicopathological factors associated with positive PD-L1 protein expression                                                                                                                                               |
|---------------|-----------|-------------|----------------|-----------------------------------------------------|-----------------------------------------------------------------------------------------------------------------------------------------------------------------------------------------------------------------------------|
| Takada et al. | 417AD     | 305/63/49/0 | 1%             | 34.5%                                               | Male gender, smoking, higher tumor grade, advanced T status, advanced N status, advanced stage, the presence of pleural and vessel invasions, micropapillary or solid predominant histological subtypes, and wild-type EGFR |
|               |           |             | 5%             | 20.4%                                               | Male gender, smoking, higher tumor grade, advanced T status, advanced N status, advanced stage, the presence of pleural and vessel invasions, micropapillary or solid predominant histological subtypes, and wild-type EGFR |
| Uruga et al.  | 109AD     | 0/82/27/0   | > 1%           | 51%                                                 | Higher N stage, solid dominant histology according to the IASLC/ATS/ERS classification, higher nuclear grade, and the presence of tumor island, necrosis, vascular                                                          |

|                   |                                    |                                         |                                        |                                |                                                                                                                                                                                                                                                                               |
|-------------------|------------------------------------|-----------------------------------------|----------------------------------------|--------------------------------|-------------------------------------------------------------------------------------------------------------------------------------------------------------------------------------------------------------------------------------------------------------------------------|
|                   |                                    |                                         | >5%                                    | 39%                            | invasion and CD8+ T cells<br>Higher T stage, higher N stage, solid dominant histology according to the IASLC/ATS/ERS classification, higher nuclear grade, and the presence of tumor island, necrosis, vascular invasion, STAS (Spread tumor alveolar space) and CD8+ T cells |
|                   |                                    |                                         | >50%                                   | 17%                            | Solid dominant histology according to the IASLC/ATS/ERS classification, the presence of necrosis, vascular invasion, and CD8+ T cells                                                                                                                                         |
| Takada et al.     | 205SCC                             | 108/73/24/0                             | >1%                                    | 51.7%                          | None                                                                                                                                                                                                                                                                          |
|                   |                                    |                                         | >5%                                    | 35.1%                          | None                                                                                                                                                                                                                                                                          |
|                   |                                    |                                         | >10%                                   | 29.7%                          | Higher N stage                                                                                                                                                                                                                                                                |
|                   |                                    |                                         | >50%                                   | 18.0%                          | Older age                                                                                                                                                                                                                                                                     |
| Shimoji et al.    | 165AD<br>55SCC                     | 145/44/33/22                            | Intensity×<br>extent                   | 22% of AD<br>and 60% of<br>SCC | AD: younger age, Smoking, high expression of P53, Vimentin, Ki-67 and P-glycoprotein, low expression of E-cadherin and ALDH1A1<br>SCC: none                                                                                                                                   |
| Ameratunga et al. | 282AD<br>182SCC                    | not available                           | Intensity<br>Moderate to<br>strong>5%  | 43.6%                          | Not available                                                                                                                                                                                                                                                                 |
|                   |                                    |                                         | Intensity<br>Moderate to<br>strong≥50% | 23.8%                          | Younger age                                                                                                                                                                                                                                                                   |
| Sun et al.        | 644AD<br>299SC<br>58LC<br>49others | I/II/IIIA/IIIB-<br>IV<br>520/284/201/65 | ≥1%                                    | 38%                            | Older age, male gender, smoking, poorer ECOG performance status (≥1 versus 0), squamous cell carcinoma, and advanced tumor stage                                                                                                                                              |
|                   |                                    |                                         | ≥50%                                   | 6%                             |                                                                                                                                                                                                                                                                               |
| Huynh et al.      | 261AD                              | 201/34/22/4                             | ≥1%                                    | 49%                            | Smoking, solid dominant histology according to the IASLC/ATS/ERS classification, high nuclear grade, presence of lymphatic invasion and venous invasion, CD8+ TILs                                                                                                            |
|                   |                                    |                                         | ≥5%                                    | 36.5%                          | Smoking, solid dominant histology according to the IASLC/ATS/ERS classification, high nuclear grade, presence of lymphatic invasion and venous, invasion, positive lymph node metastasis, CD8+ TILs                                                                           |
|                   |                                    |                                         | ≥50%                                   | 24%                            | Smoking, solid dominant histology according to the IASLC/ATS/ERS classification, high nuclear grade, presence of lymphatic invasion and venous, invasion, higher T stage, CD8+ TILs                                                                                           |
| Takada et al.     | 417AD<br>82SCC                     | 354/82/63/0                             | >1%                                    | 37.9%                          | male sex, smoking, higher tumor grade, higher T stage, higher N stage, advanced stage, the presence of Pleural invasion and vascular invasion, squamous cell carcinoma, and wild-type EGFR                                                                                    |
|                   |                                    |                                         | >5%                                    | 23.8%                          | male sex, smoking, higher tumor grade, higher T stage, higher N stage, advanced stage, the presence of Pleural invasion and vascular invasion, squamous cell carcinoma, and wild-type EGFR                                                                                    |
|                   |                                    |                                         | >10%                                   | 14.2%                          | male sex, smoking, higher tumor grade, higher T stage, advanced stage, the presence of Pleural invasion and vascular invasion, squamous cell carcinoma, and wild-type EGFR                                                                                                    |
|                   |                                    |                                         | >50%                                   | 7.8%                           | male sex, smoking, higher tumor grade, advanced stage, the presence of vascular invasion, squamous cell carcinoma, and wild-                                                                                                                                                  |

|                                                                      |               |                      |                      |       |                                                                                                                                      |
|----------------------------------------------------------------------|---------------|----------------------|----------------------|-------|--------------------------------------------------------------------------------------------------------------------------------------|
| Wu et al.                                                            | 133AD         | 65/16/42/10          | >25%                 | 13.5% | type EGFR<br>male sex, smoking, solid, papillary or micropapillary dominant histology according to the IASLC/ATS/ERS classification  |
| Okita et al.<br>[12][12][12][<br>12][12][12][<br>12][12][12][<br>12] | 71AD<br>20SCC | IA/IB-III A<br>35/56 | Intensity×<br>extent | 14%   | Male gender, smoking, SUVmax on FDG-PET/CT scan, higher tumor grade, adenocarcinoma, higher N stage, advanced stage, EGFR expression |

DFS: disease-free survival. OS: overall survival. RFS: recurrence-free survival. AD: adenocarcinoma. SCC: squamous cell carcinoma.

**Supplementary Figure S1.**

Kaplan-Meier survival curves of DFS (A, C, E) and OS (B, D, F) according to PD-L1 expression at 1% (A, B), 5% (C, D) and 10% (E, F) cutoff values (negative vs. positive) in NSCLC patients. Kaplan-Meier survival curves of DFS (G) and OS (H) according to PD-L2 expression (negative vs. positive) in NSCLC patients.

**Supplementary Figure S1.**

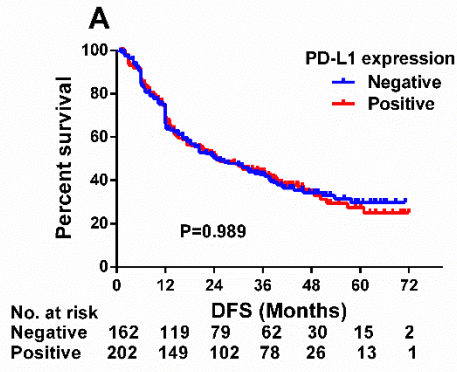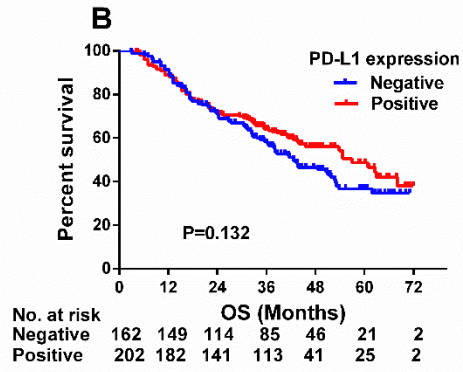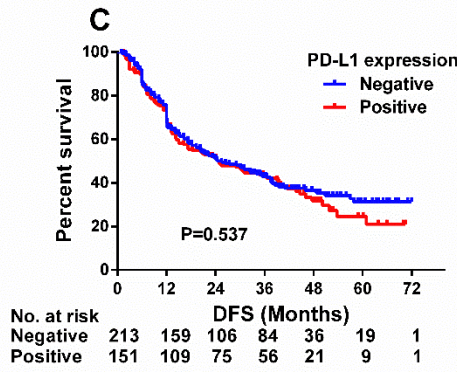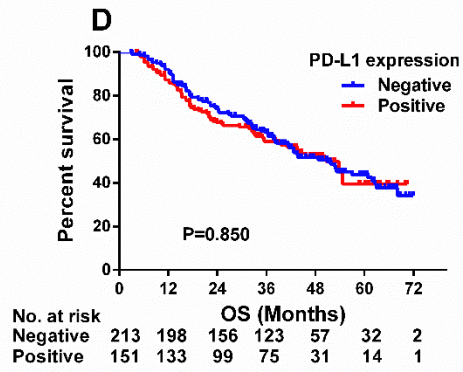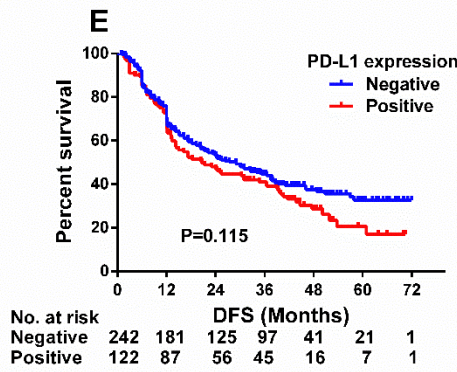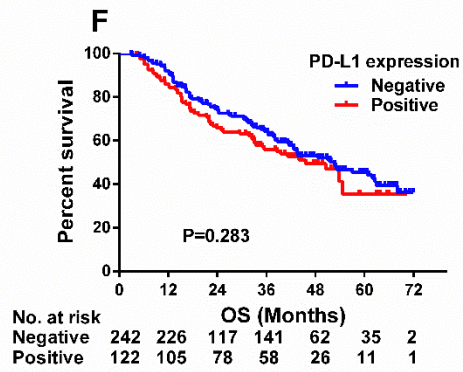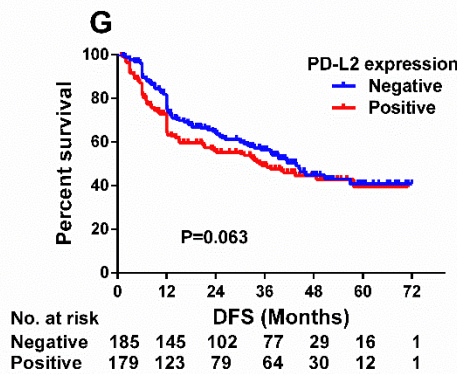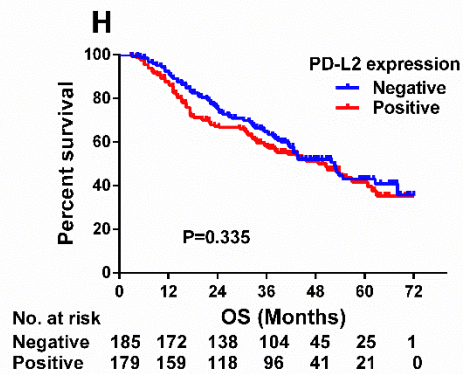

Supplement: jcav08p3251s1.pdf [file jcav08p3251s1.pdf]
